# Supplementary material for: Germline variants at SOHLH2 influence multiple myeloma risk
Source: PubMed Central journal article supplement (PMC8055668; doi:10.1038/s41408-021-00468-6), 2021-04-19

# Supplementary Figure 1

Expression of *SOHLH2* across human blood cell types. Data from (a) the differentiation map (D-MAP) and (b) the HemaExplorer datasets, both visualized using the Bloodspot portal ([www.bloodspot.eu](http://www.bloodspot.eu)).

**a**

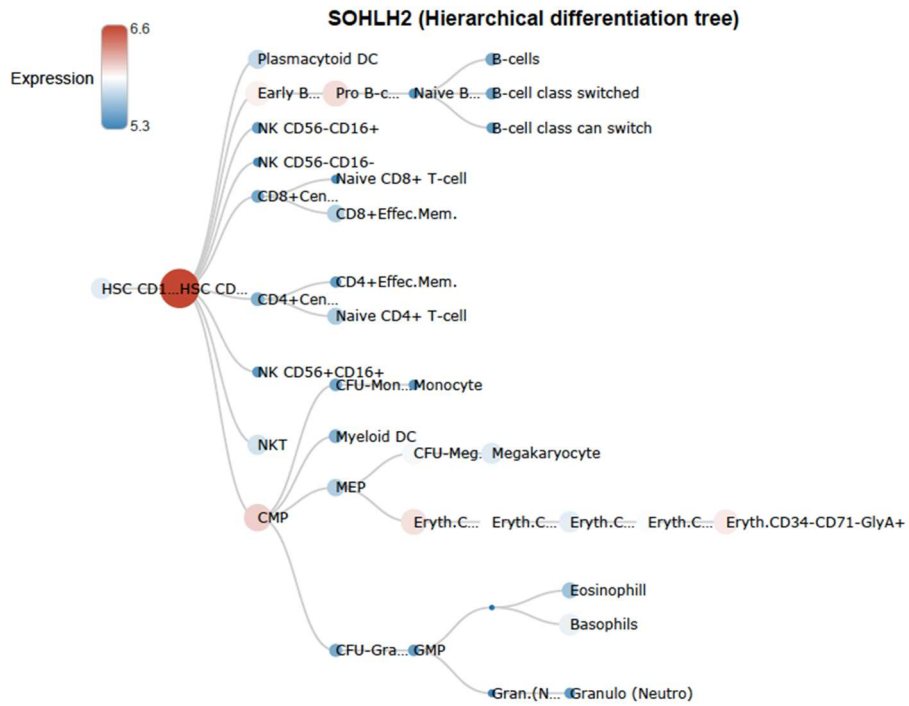

**b**

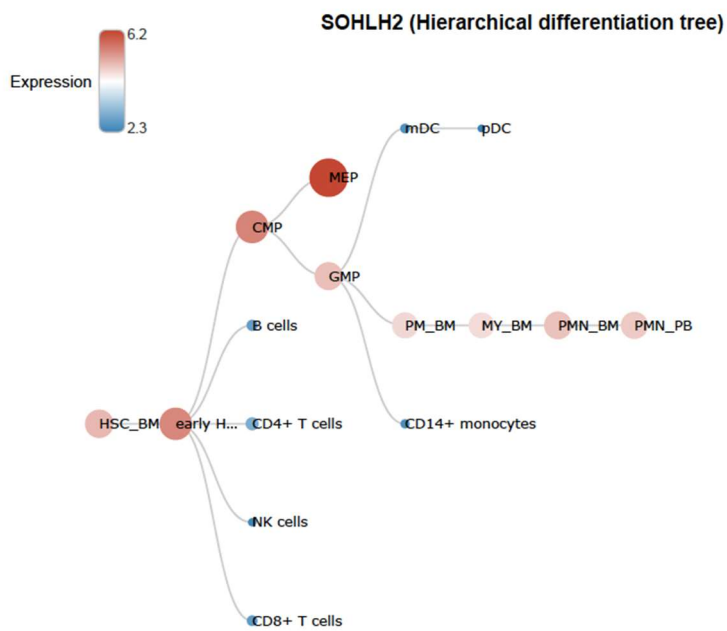

Supplement: 41408_2021_468_MOESM1_ESM.pdf [file 41408_2021_468_MOESM1_ESM.pdf]
