# Supplementary material for: Germline variants at SOHLH2 influence multiple myeloma risk
Source: PubMed Central journal article supplement (PMC8055668; doi:10.1038/s41408-021-00468-6), 2021-04-19
Supplement: 41408_2021_468_MOESM2_ESM.pdf [file 41408_2021_468_MOESM2_ESM.pdf]

## Supplementary Table 1

Association data for MM risk variants identified in previous, major genome-wide association studies.  
 RAF: risk allele frequency, extracted from Ensembl (1000 genomes Phase 3, EUR). \*major alleles underlined

| Candidate gene                     | locus    | rsID              | Risk allele* | RAF  | Discovery study           |      |                        | Present study |              |              |             |      |                        |         |
|------------------------------------|----------|-------------------|--------------|------|---------------------------|------|------------------------|---------------|--------------|--------------|-------------|------|------------------------|---------|
|                                    |          |                   |              |      | Ref.                      | OR   | P - value              | Sweden freq   | Iceland freq | Denmark freq | Norway freq | OR   | P - value              | P - het |
| <i>DTNB</i>                        | 2p23.3   | rs6746082         | <u>A</u>     | 0.48 | Broderik <i>et al.</i>    | 1.29 | 1.22x10 <sup>-7</sup>  | 0.76          | 0.76         | 0.77         | 0.75        | 1.19 | 1.62x10 <sup>-10</sup> | 0.42    |
| <i>SP3</i>                         | 2q31.1   | rs4325816         | <u>I</u>     | 0.77 | Went <i>et al.</i>        | 1.12 | 7.37x10 <sup>-9</sup>  | 0.78          | 0.77         | 0.77         | 0.76        | 1.08 | 5.16x10 <sup>-3</sup>  | 0.39    |
| <i>ULK4</i>                        | 3p22.1   | rs1052501         | C            | 0.19 | Broderik <i>et al.</i>    | 1.32 | 7.47x10 <sup>-9</sup>  | 0.16          | 0.14         | 0.15         | 0.16        | 1.20 | 4.34x10 <sup>-9</sup>  | 0.26    |
| <i>ACTRT3, MYNN, LRRC34</i>        | 3q26.2   | rs10936599        | <u>C</u>     | 0.76 | Chubb <i>et al.</i>       | 1.26 | 8.7x10 <sup>-14</sup>  | 0.74          | 0.79         | 0.74         | 0.74        | 1.16 | 3.14x10 <sup>-8</sup>  | 0.65    |
| <i>ELL2</i>                        | 5q15     | rs56219066        | <u>I</u>     | 0.72 | Swaminathan <i>et al.</i> | 1.25 | 9.6x10 <sup>-10</sup>  | 0.74          | 0.71         | 0.75         | 0.74        | 1.15 | 3.80x10 <sup>-8</sup>  | 0.43    |
| <i>CEP120</i>                      | 5q23.2   | rs6595443         | T            | 0.45 | Went <i>et al.</i>        | 1.11 | 1.20x10 <sup>-8</sup>  | 0.43          | 0.43         | 0.42         | 0.43        | 1.08 | 1.37x10 <sup>-3</sup>  | 0.85    |
| <i>JARID2</i>                      | 6p22.3   | rs34229995        | G            | 0.02 | Mitchell <i>et al.</i>    | 1.37 | 1.31x10 <sup>-8</sup>  | 0.03          | 0.03         | 0.02         | 0.03        | 1.30 | 2.74x10 <sup>-5</sup>  | 0.57    |
| <i>PSORS1C2</i>                    | 6p21.3   | rs2285803         | T            | 0.26 | Chubb <i>et al.</i>       | 1.19 | 9.67x10 <sup>-11</sup> | 0.31          | 0.35         | 0.30         | 0.30        | 1.17 | 1.37x10 <sup>-11</sup> | 0.13    |
| <i>ATG5</i>                        | 6q21     | rs9372120         | G            | 0.19 | Mitchell <i>et al.</i>    | 1.18 | 9.09x10 <sup>-15</sup> | 0.22          | 0.20         | 0.21         | 0.22        | 1.14 | 1.80x10 <sup>-6</sup>  | 0.88    |
| <i>CDCA7L</i>                      | 7p15.3   | rs4487645         | <u>C</u>     | 0.66 | Broderik <i>et al.</i>    | 1.38 | 3.33x10 <sup>-15</sup> | 0.66          | 1.00         | 0.67         | 0.66        | 1.26 | 5.20x10 <sup>-15</sup> | 0.21    |
| <i>AC004917.1, CDC71L</i>          | 7q22.3   | rs17507636        | <u>C</u>     | 0.74 | Went <i>et al.</i>        | 1.12 | 9.20x10 <sup>-9</sup>  | 0.76          | 0.74         | 0.74         | 0.75        | 1.12 | 2.73x10 <sup>-5</sup>  | 0.25    |
| <i>POT1, RP11-3B12.1</i>           | 7q31.33  | rs58618031        | <u>I</u>     | 0.73 | Went <i>et al.</i>        | 1.12 | 2.73x10 <sup>-8</sup>  | 0.72          | 0.76         | 0.72         | 0.73        | 1.06 | 2.02x10 <sup>-2</sup>  | 0.68    |
| <i>SMARCD3</i>                     | 7q36.1   | rs7781265         | A            | 0.09 | Mitchell <i>et al.</i>    | 1.19 | 9.79x10 <sup>-9</sup>  | 0.12          | 0.15         | 0.12         | 0.13        | 1.22 | 3.27x10 <sup>-10</sup> | 0.81    |
| <i>CCAT1</i>                       | 8q24.21  | rs1948915         | C            | 0.33 | Mitchell <i>et al.</i>    | 1.13 | 4.20x10 <sup>-11</sup> | 0.37          | 0.34         | 0.36         | 0.34        | 1.09 | 2.20x10 <sup>-4</sup>  | 0.056   |
| <i>CDKN2A</i>                      | 9p21.3   | rs2811710         | <u>C</u>     | 0.64 | Mitchell <i>et al.</i>    | 1.15 | 1.72x10 <sup>-13</sup> | 0.66          | 0.62         | 0.65         | 0.65        | 1.10 | 2.19x10 <sup>-5</sup>  | 0.023   |
| <i>WAC</i>                         | 10p12.1  | rs2790457         | <u>G</u>     | 0.74 | Mitchell <i>et al.</i>    | 1.12 | 1.77x10 <sup>-8</sup>  | 0.73          | 0.71         | 0.73         | 0.72        | 1.11 | 6.64x10 <sup>-5</sup>  | 0.15    |
| <i>CCND1</i>                       | 11q13.3  | rs603965 (rs9344) | <u>G</u>     | 0.50 | Weinhold <i>et al.</i>    | 1.82 | 2.92x10 <sup>-10</sup> | 0.52          | 0.53         | 0.54         | 0.55        | 1.08 | 7.30x10 <sup>-4</sup>  | 0.29    |
| <i>PRR14, SRCAP, RP11-146F11.1</i> | 16p11.2  | rs13338946        | C            | 0.28 | Went <i>et al.</i>        | 1.15 | 1.02x10 <sup>-13</sup> | 0.27          | 0.27         | 0.27         | 0.25        | 1.12 | 6.39x10 <sup>-6</sup>  | 0.56    |
| <i>RFWD3</i>                       | 16q23.1  | rs7193541         | <u>I</u>     | 0.61 | Mitchell <i>et al.</i>    | 1.13 | 5.00x10 <sup>-12</sup> | 0.58          | 0.58         | 0.58         | 0.59        | 1.06 | 9.44x10 <sup>-3</sup>  | 0.65    |
| <i>TNFRSF13B</i>                   | 17p11.2  | rs4273077         | G            | 0.10 | Chubb <i>et al.</i>       | 1.26 | 7.67x10 <sup>-9</sup>  | 0.11          | 0.08         | 0.10         | 0.10        | 1.32 | 3.33x10 <sup>-14</sup> | 0.44    |
| <i>KLF2</i>                        | 19p13.11 | rs11086029        | T            | 0.23 | Went <i>et al.</i>        | 1.14 | 6.79x10 <sup>-11</sup> | 0.22          | 0.25         | 0.24         | 0.25        | 1.05 | 4.70x10 <sup>-2</sup>  | 0.88    |
| <i>PREX1</i>                       | 20q13.13 | rs6066835         | C            | 0.09 | Mitchell <i>et al.</i>    | 1.26 | 1.36x10 <sup>-13</sup> | 0.08          | 0.10         | 0.08         | 0.09        | 1.20 | 1.55x10 <sup>-6</sup>  | 0.024   |
| <i>HMGXB4, TOM1</i>                | 22q13.1  | rs138740          | C            | 0.34 | Swaminathan <i>et al.</i> | 1.18 | 5.7x10 <sup>-8</sup>   | 0.37          | 0.42         | 0.37         | 0.38        | 1.08 | 6.37x10 <sup>-4</sup>  | 0.8     |
| <i>CBX7</i>                        | 22q13.1  | rs877529          | A            | 0.44 | Chubb <i>et al.</i>       | 1.23 | 7.63x10 <sup>-16</sup> | 0.46          | 0.45         | 0.44         | 0.47        | 1.15 | 1.12x10 <sup>-9</sup>  | 0.3     |

Broderick P *et al.* Common variation at 3p22.1 and 7p15.3 influences multiple myeloma risk. *Nat Genet.* 2012;44(1):58–61.

Chubb D *et al.* Common variation at 3q26.2, 6p21.33, 17p11.2 and 22q13.1 influences multiple myeloma risk. *Nat Genet.* 2013;45(10):1221–5.

Mitchell JS *et al.* Genome-wide association study identifies multiple susceptibility loci for multiple myeloma. *Nat Commun.* 2016;7(May).

Swaminathan B *et al.* Variants in ELL2 influencing immunoglobulin levels associate with multiple myeloma. *Nat Commun.* 2015;6(May):1–8.

Weinhold N *et al.* The CCND1 c.870G>A polymorphism is a risk factor for t(11;14)(q13;q32) multiple myeloma. *Nat Genet.* 2013;45(5):522–5.

Went M *et al.* Identification of multiple risk loci and regulatory mechanisms influencing susceptibility to multiple myeloma. *Nat Commun.* 2018;9(1):1–10.
