# Supplementary material for: Germline variants at SOHLH2 influence multiple myeloma risk
Source: PubMed Central journal article supplement (PMC8055668; doi:10.1038/s41408-021-00468-6), 2021-04-19
Supplement: 41408_2021_468_MOESM3_ESM.pdf [file 41408_2021_468_MOESM3_ESM.pdf]

## Supplementary Table 2

Variants with 13q13 linkage disequilibrium block ( $r^2 > 0.8$ ).

| rsID        | European MAF | Effect allele | Other allele | Sweden p-value | Iceland p-value | Denmark p-value | Norway p-value | combined p-value | combined odds ratio |
|-------------|--------------|---------------|--------------|----------------|-----------------|-----------------|----------------|------------------|---------------------|
| rs200203825 | 4.47         | AC            | A            | 1.14E-03       | 1.10E-04        | 8.61E-05        | 4.16E-01       | <b>2.65E-10</b>  | 1.38                |
| rs145374408 | 3.54         | C             | CATA         | 1.28E-03       | 3.80E-04        | 6.06E-05        | 3.44E-01       | <b>5.99E-10</b>  | 1.38                |
| rs78351393  | 3.44         | C             | T            | 1.74E-03       | 3.75E-04        | 5.63E-05        | 3.42E-01       | <b>7.61E-10</b>  | 1.38                |
| rs76601148  | 3.45         | G             | A            | 1.80E-03       | 3.76E-04        | 5.64E-05        | 3.42E-01       | <b>7.9E-10</b>   | 1.38                |
| rs17202418  | 3.43         | C             | T            | 1.76E-03       | 3.70E-04        | 6.35E-05        | 3.50E-01       | <b>8.57E-10</b>  | 1.38                |
| rs74694612  | 3.44         | T             | C            | 2.61E-03       | 4.16E-04        | 4.31E-05        | 3.46E-01       | <b>1.06E-09</b>  | 1.37                |
| rs2149425   | 3.43         | T             | C            | 2.86E-03       | 3.77E-04        | 4.36E-05        | 3.48E-01       | <b>1.08E-09</b>  | 1.37                |
| rs2322895   | 3.43         | T             | C            | 2.89E-03       | 3.81E-04        | 4.35E-05        | 3.48E-01       | <b>1.1E-09</b>   | 1.37                |
| rs74656720  | 3.43         | C             | T            | 2.87E-03       | 3.81E-04        | 4.37E-05        | 3.48E-01       | <b>1.1E-09</b>   | 1.37                |
| rs78972162  | 3.43         | C             | T            | 2.88E-03       | 3.81E-04        | 4.41E-05        | 3.48E-01       | <b>1.11E-09</b>  | 1.37                |
| rs75933854  | 3.41         | T             | C            | 2.88E-03       | 3.93E-04        | 4.36E-05        | 3.48E-01       | <b>1.14E-09</b>  | 1.37                |
| rs77706449  | 3.43         | T             | C            | 2.89E-03       | 4.03E-04        | 4.36E-05        | 3.48E-01       | <b>1.17E-09</b>  | 1.37                |
| rs78518801  | 3.45         | T             | C            | 2.64E-03       | 3.78E-04        | 6.03E-05        | 3.90E-01       | <b>1.45E-09</b>  | 1.37                |
| rs75712673  | 3.45         | G             | T            | 2.79E-03       | 3.79E-04        | 6.05E-05        | 3.92E-01       | <b>1.55E-09</b>  | 1.37                |
