# Supplementary material for: Germline variants at SOHLH2 influence multiple myeloma risk
Source: PubMed Central journal article supplement (PMC8055668; doi:10.1038/s41408-021-00468-6), 2021-04-19
Supplement: 41408_2021_468_MOESM4_ESM.pdf [file 41408_2021_468_MOESM4_ESM.pdf]

## Supplementary Table 3

Predicted transcription factor binding motif changes for rs75712673, sorted by absolute log<sub>2</sub> fold change (FC).

| Motif collection | motif           | P-value T | P-value G | log2 FC |
|------------------|-----------------|-----------|-----------|---------|
| HOCOMOCO         | FO XK1          | 2.75E-03  | 8.88E-06  | 8.2728  |
| Swiss Regulon    | IKZF2           | 2.38E-07  | 1.06E-04  | -8.8005 |
| JASPAR           | EN1             | 8.98E-03  | 9.69E-05  | 6.5342  |
| Swiss Regulon    | SRY             | 2.30E-03  | 2.85E-05  | 6.3319  |
| HT-SELEX         | FOXJ3           | 2.06E-02  | 3.05E-04  | 6.0819  |
| Swiss Regulon    | EN1,2           | 6.41E-03  | 9.62E-05  | 6.0581  |
| JASPAR           | SRY             | 3.07E-03  | 5.15E-05  | 5.8967  |
| HOCOMOCO         | FOXD3           | 4.01E-03  | 8.03E-05  | 5.6416  |
| HT-SELEX         | FOXC2           | 5.02E-03  | 1.06E-04  | 5.5610  |
| Swiss Regulon    | SOX5            | 2.68E-03  | 6.10E-05  | 5.4591  |
| Swiss Regulon    | ZNF384          | 7.05E-05  | 2.93E-03  | -5.3775 |
| HOCOMOCO         | FOXM1           | 3.39E-03  | 9.41E-05  | 5.1697  |
| HT-SELEX         | FOXG1           | 1.00E-03  | 3.13E-05  | 5.0012  |
| HOCOMOCO         | FOXO6           | 6.34E-03  | 2.01E-04  | 4.9813  |
| HOCOMOCO         | FOXP2           | 7.88E-03  | 2.94E-04  | 4.7431  |
| HOMER            | FOXO1           | 4.00E-03  | 1.60E-04  | 4.6453  |
| HOCOMOCO         | IRF7            | 2.80E-04  | 6.66E-03  | -4.5724 |
| HT-SELEX         | FOXO1           | 1.04E-02  | 4.73E-04  | 4.4629  |
| HOCOMOCO         | FOXO3           | 1.00E-02  | 4.58E-04  | 4.4511  |
| HT-SELEX         | FOXJ3           | 5.58E-04  | 2.57E-05  | 4.4394  |
| HOCOMOCO         | FOXG1           | 5.65E-04  | 2.61E-05  | 4.4357  |
| HOCOMOCO         | SOX13           | 6.50E-03  | 3.05E-04  | 4.4128  |
| HOCOMOCO         | HOMER           | 2.39E-03  | 1.14E-04  | 4.3928  |
| HOCOMOCO         | BARX1           | 1.62E-03  | 8.17E-05  | 4.3109  |
| JASPAR           | STAT2+STAT1     | 7.13E-04  | 4.01E-05  | 4.1532  |
| JASPAR           | FOXO1           | 5.53E-03  | 3.11E-04  | 4.1525  |
| HOMER            | FOXA1           | 5.81E-03  | 3.60E-04  | 4.0133  |
| Swiss Regulon    | FOXP3           | 1.25E-06  | 2.02E-05  | -4.0126 |
| HT-SELEX         | MYF6            | 7.41E-03  | 4.79E-04  | 3.9532  |
| HOCOMOCO         | SOX18           | 2.78E-03  | 1.80E-04  | 3.9478  |
| HOCOMOCO         | CPEB1           | 4.82E-04  | 7.43E-03  | -3.9477 |
| HOMER            | FOXA1           | 3.93E-03  | 2.55E-04  | 3.9438  |
| HOMER            | TAL1            | 1.63E-03  | 1.06E-04  | 3.9414  |
| HOCOMOCO         | SOX5            | 5.03E-03  | 3.29E-04  | 3.9329  |
| Swiss Regulon    | HBP1_HMGB_SSRP1 | 3.65E-03  | 2.44E-04  | 3.9037  |
| JASPAR           | FOXP2           | 4.55E-03  | 3.10E-04  | 3.8769  |
| Swiss Regulon    | FOX{F1,F2,J1}   | 2.94E-03  | 2.01E-04  | 3.8716  |
| HT-SELEX         | FO XK1          | 4.78E-03  | 3.27E-04  | 3.8715  |
| JASPAR           | SOX5            | 1.73E-03  | 1.22E-04  | 3.8264  |
| JASPAR           | FOXF2           | 3.08E-03  | 2.32E-04  | 3.7326  |
| Swiss Regulon    | EVI1            | 8.75E-05  | 1.16E-03  | -3.7311 |
| Swiss Regulon    | FOX{D1,D2}      | 4.09E-03  | 3.23E-04  | 3.6610  |
| JASPAR           | FOXA2           | 3.57E-03  | 2.82E-04  | 3.6608  |

|               |           |          |          |         |
|---------------|-----------|----------|----------|---------|
| Swiss Regulon | FOXA2     | 3.57E-03 | 2.82E-04 | 3.6608  |
| HT-SELEX      | FOXB1     | 6.10E-03 | 4.83E-04 | 3.6602  |
| HOCOMOCO      | PRDM6     | 6.63E-06 | 8.19E-05 | -3.6285 |
| HOCOMOCO      | FOXF1     | 4.21E-03 | 3.42E-04 | 3.6226  |
| HT-SELEX      | FOXK1     | 2.80E-03 | 2.32E-04 | 3.5912  |
| HOMER         | SPDEF     | 5.02E-03 | 4.17E-04 | 3.5909  |
| Swiss Regulon | ZBTB16    | 6.53E-05 | 7.86E-04 | -3.5900 |
| HOCOMOCO      | FOXC1     | 4.48E-03 | 3.87E-04 | 3.5314  |
| HOCOMOCO      | NFAT5     | 1.10E-04 | 1.25E-03 | -3.5029 |
| HOCOMOCO      | FOXF2     | 1.90E-03 | 1.69E-04 | 3.4937  |
| HOCOMOCO      | FOXJ3     | 3.01E-03 | 2.73E-04 | 3.4597  |
| JASPAR        | NFATC2    | 8.63E-05 | 9.46E-04 | -3.4534 |
| Swiss Regulon | FOXO1,3,4 | 2.66E-03 | 2.44E-04 | 3.4491  |
| Swiss Regulon | ETS1,2    | 1.99E-03 | 1.91E-04 | 3.3792  |
| HOCOMOCO      | FOXQ1     | 4.50E-03 | 4.37E-04 | 3.3641  |
| HT-SELEX      | FOXG1     | 1.41E-03 | 1.43E-04 | 3.3090  |
| HOCOMOCO      | SOX11     | 4.43E-03 | 4.58E-04 | 3.2730  |
| HT-SELEX      | SOX3      | 3.24E-03 | 3.60E-04 | 3.1676  |
| HT-SELEX      | SOX2      | 3.24E-03 | 3.78E-04 | 3.0971  |
| HOMER         | FLI1      | 1.89E-03 | 2.25E-04 | 3.0679  |
| HT-SELEX      | E2F2      | 5.32E-04 | 6.53E-05 | 3.0275  |
| HT-SELEX      | FOXO3     | 1.04E-03 | 1.29E-04 | 3.0127  |
| HT-SELEX      | SOX2      | 3.75E-03 | 4.83E-04 | 2.9565  |
| HT-SELEX      | SOX2      | 2.80E-03 | 3.97E-04 | 2.8163  |
| HT-SELEX      | E2F2      | 1.56E-03 | 2.21E-04 | 2.8154  |
| HOCOMOCO      | ZN384     | 1.17E-04 | 7.92E-04 | -2.7585 |
| Swiss Regulon | FOXQ1     | 2.80E-03 | 4.17E-04 | 2.7458  |
| HOMER         | ERG       | 7.47E-04 | 1.12E-04 | 2.7426  |
| HT-SELEX      | SOX15     | 2.16E-03 | 3.26E-04 | 2.7275  |
| HOCOMOCO      | SOX21     | 1.11E-03 | 1.71E-04 | 2.6988  |
| HT-SELEX      | FOXC1     | 1.72E-03 | 2.82E-04 | 2.6068  |
| HOCOMOCO      | ZN563     | 1.00E-05 | 1.81E-06 | 2.4691  |
| HT-SELEX      | ETV6      | 2.19E-03 | 3.97E-04 | 2.4640  |
| HOCOMOCO      | NFAC2     | 3.21E-04 | 1.70E-03 | -2.4047 |
| HT-SELEX      | ETV2      | 5.59E-04 | 1.06E-04 | 2.3936  |
| HT-SELEX      | SPDEF     | 2.82E-04 | 1.48E-03 | -2.3933 |
| JASPAR        | FOXP1     | 1.16E-03 | 2.32E-04 | 2.3232  |
| HOCOMOCO      | SOX7      | 2.04E-03 | 4.19E-04 | 2.2825  |
| Swiss Regulon | PAX4      | 1.91E-04 | 9.10E-04 | -2.2527 |
| HOCOMOCO      | NFAC4     | 1.48E-04 | 6.42E-04 | -2.1206 |

TFBS:transcription factor binding site, SNP: single nucleotide polymorphism.
